# Supplementary material for: Women's agricultural practices and their effects on soil nutrient content in the Nyalenda urban gardens of Kisumu, Kenya
Source: Copernicus journal article supplement (doi:10.5194/soil-5-303-2019), 2019-10-15
Supplement: Supplementary file 1 [file Supplement_S1_S2_S3_IandFGDs_1_7_19.pdf › Supplement_S1_S2_S3_IandFGDs_1_7_19.pdf]

## **S1. Supplement interviews:**

### **Interview questions:**

#### Opening questions:

- *Can you describe what you do on your field on a typical day?*
- *How do you fertilize you fields?*

#### Key Questions:

- *What do you know about what the soil needs for growing crops?*
- *What do you know about the effect of fertilizer on the soil?*
- *What methods to fertilize your fields do you know?*
- *How do you know this? Where did you get your knowledge?*
- *Did you ever see differences in crops or the soil when you or somebody else changed their methods?*
- *Did you ever share this information with others?*
- *Is there an opportunity to share knowledge within the farmers group?*
- *Do you feel your knowledge is valued by others?*
- *Is it easier to share knowledge with other women?*

## **S2. Supplement focus group discussions:**

### **Focus group discussion questions and exercise:**

- *What does your day on the farm look like?*
- *How do you take care of your fields and crops? How do you decide on this?*
- *How do you know what you have to do to take care of your fields and crops? Where do you get this information?*
- *Can you rank the sources of information on validity and give a short explanation about their final ranking?*
- *When do you share your knowledge, to whom and why?*

**S3. Anonymous participants list focus group discussion:**

| Focus group discussion participants: |        |                   |                     |
|--------------------------------------|--------|-------------------|---------------------|
| ID                                   | Gender | Age (approximate) | # or size of fields |
| I2                                   | female | late 40's         | 3                   |
| I3                                   | female | late 20's         | 3                   |
| I5                                   | female | late 30's         | 3                   |
| I8                                   | female | early 50's        | 8                   |
| I9                                   | male   | late 30's.        | 7                   |
| I10                                  | male   | early 40's.       | 4                   |
| I11                                  | male   | late 30's.        | 3                   |
| I12                                  | male   | late 20's.        | unknown             |
| I14                                  | male   | late 20's.        | unknown             |
| I17                                  | female | late 40's.        | 1.5 acre            |
| I18                                  | female | early 60's.       | unknown             |
