# Supplementary material for: Women's agricultural practices and their effects on soil nutrient content in the Nyalenda urban gardens of Kisumu, Kenya
Source: Copernicus journal article supplement (doi:10.5194/soil-5-303-2019), 2019-10-15
Supplement: Supplementary file 2 [file Supplement_S4_WK_TJ.pdf › Supplement_S4_WK_TJ.pdf]

|            |               |      |         |         |           |       | Exchangeable: |         |         |        |          | Available |        |        | Total   |          |         | % of total exchangeable |       |       | % of total available |      |      |         |       |       |        |           |
|------------|---------------|------|---------|---------|-----------|-------|---------------|---------|---------|--------|----------|-----------|--------|--------|---------|----------|---------|-------------------------|-------|-------|----------------------|------|------|---------|-------|-------|--------|-----------|
| Management |               | pH   | Total C | Total N | C:N Ratio | TOC   | Mg            | Ca      | K       | Na     | CEC      | Mg        | Ca     | K      | Mg      | Ca       | K       | Mg                      | Ca    | K     | Mg                   | Ca   | K    | NO3+NO2 | NH4   | PO4   | SO4    | Mineral N |
| Unit       |               | -    | mg/kg   | mg/kg   |           | mg/l  | mg/kg         | mg/kg   | mg/kg   | mg/kg  | meq/100g | mg/kg     | mg/kg  | mg/kg  | mg/kg   | mg/kg    | mg/kg   | %                       | %     | %     | %                    | %    | %    | mg/kg   | mg/kg | mg/kg | mg/kg  | mg/kg     |
| 16_EK_1    | Manure        | 7.05 | 58300.0 | 3282.0  | 17.76     | 59.71 | 479.40        | 6315.53 | 1124.09 | 97.67  | 38.88    | 17.86     | 140.72 | 117.34 | 2350.05 | 10077.43 | 4742.06 | 20.40                   | 62.67 | 23.70 | 0.76                 | 1.40 | 2.47 | 56.62   | 2.73  | 8.25  | 43.11  | 59.35     |
| 16_EK_2    | Manure        | 7.19 | 59400.0 | 3074.5  | 19.32     | 59.80 | 455.11        | 6109.44 | 1120.65 | 86.87  | 37.59    | 18.17     | 134.69 | 115.67 | 2402.55 | 10487.06 | 4914.03 | 18.94                   | 58.26 | 22.81 | 0.76                 | 1.28 | 2.35 | 85.02   | 3.09  | 7.67  | 35.17  | 88.11     |
| 16_EK_3    | Manure        | 7.29 | 36450.0 | 2729.5  | 13.35     | 66.30 | 661.81        | 5334.79 | 2044.06 | 128.31 | 37.99    | 14.85     | 74.23  | 177.13 | 2617.41 | 8888.61  | 5989.26 | 25.28                   | 60.02 | 34.13 | 0.57                 | 0.84 | 2.96 | 114.31  | 2.76  | 30.42 | 38.85  | 117.08    |
| 16_EK_4    | Manure        | 7.35 | 34250.0 | 2687.0  | 12.75     | 62.88 | 585.08        | 4682.01 | 1874.10 | 128.40 | 33.65    | 17.40     | 84.07  | 212.94 | 2540.72 | 8042.18  | 5853.13 | 23.03                   | 58.22 | 32.02 | 0.68                 | 1.05 | 3.64 | 154.15  | 2.65  | 31.32 | 44.64  | 156.81    |
| 16_EK_5    | Manure        | 7.35 | 37950.0 | 3030.0  | 12.52     | 85.70 | 739.46        | 5568.83 | 2192.29 | 136.40 | 40.22    | 18.45     | 83.24  | 215.75 | 2669.70 | 8384.27  | 6204.71 | 27.70                   | 66.42 | 35.33 | 0.69                 | 0.99 | 3.48 | 32.61   | 3.83  | 44.94 | 62.47  | 36.45     |
| 16_EK_6    | Manure        | 7.37 | 38300.0 | 3181.0  | 12.04     | 80.81 | 657.58        | 5089.28 | 1987.76 | 115.48 | 36.53    | 18.13     | 81.95  | 216.06 | 2609.99 | 8291.58  | 6083.68 | 25.19                   | 61.38 | 32.67 | 0.69                 | 0.99 | 3.55 | 27.18   | 3.19  | 41.61 | 63.88  | 30.37     |
| 16_EK_7    | Manure        | 7.27 | 37750.0 | 2971.5  | 12.70     | 58.52 | 497.64        | 5702.35 | 1459.91 | 108.57 | 36.87    | 16.90     | 122.65 | 145.27 | 2710.67 | 9979.77  | 5709.49 | 18.36                   | 57.14 | 25.57 | 0.62                 | 1.23 | 2.54 | 137.61  | 2.86  | 11.47 | 36.88  | 140.47    |
| 16_EK_8    | Manure        | 7.35 | 33900.0 | 2594.5  | 13.07     | 61.48 | 504.25        | 5681.02 | 1375.99 | 110.90 | 36.62    | 17.68     | 127.37 | 150.33 | 2673.15 | 9950.81  | 5676.24 | 18.86                   | 57.09 | 24.24 | 0.66                 | 1.28 | 2.65 | 151.00  | 3.11  | 11.16 | 36.14  | 154.11    |
| 16_EK_9    | Manure        | 7.32 | 38850.0 | 2960.5  | 13.12     | 75.48 | 610.13        | 5893.15 | 1979.80 | 107.77 | 40.10    | 22.78     | 130.75 | 231.58 | 2711.50 | 9810.68  | 6387.54 | 22.50                   | 60.07 | 30.99 | 0.84                 | 1.33 | 3.63 | 160.68  | 4.43  | 26.46 | 59.32  | 165.10    |
| 16_EK_10   | Manure        | 7.3  | 43450.0 | 3129.5  | 13.88     | 63.08 | 526.35        | 5341.81 | 1539.41 | 76.99  | 35.38    | 23.13     | 136.95 | 198.23 | 2584.70 | 10480.17 | 5795.26 | 20.36                   | 50.97 | 26.56 | 0.89                 | 1.31 | 3.42 | 182.67  | 3.38  | 21.28 | 46.39  | 186.05    |
| 16_EK_11   | Manure        | 7.28 | 55450.0 | 3440.0  | 16.12     | 68.14 | 521.80        | 6225.69 | 1459.26 | 69.34  | 39.52    | 24.56     | 175.55 | 185.54 | 2417.41 | 11120.69 | 5184.60 | 21.59                   | 55.98 | 28.15 | 1.02                 | 1.58 | 3.58 | 156.70  | 4.63  | 9.60  | 55.78  | 161.33    |
| 16_EK_12   | Manure        | 7.32 | 60250.0 | 3506.0  | 17.18     | 58.33 | 449.88        | 6122.42 | 1257.13 | 61.31  | 37.85    | 19.76     | 155.01 | 141.01 | 2339.24 | 10715.49 | 5054.02 | 19.23                   | 57.14 | 24.87 | 0.84                 | 1.45 | 2.79 | 173.76  | 3.51  | 9.23  | 46.97  | 177.27    |
| 16_EK_13   | M + Intercrop | 7.36 | 25450.0 | 2481.0  | 10.26     | 58.33 | 538.57        | 4171.18 | 1436.82 | 92.64  | 29.43    | 19.99     | 95.21  | 179.63 | 2053.54 | 5802.99  | 4839.44 | 26.23                   | 71.88 | 29.69 | 0.97                 | 1.64 | 3.71 | 114.24  | 4.14  | 16.15 | 17.77  | 118.38    |
| 16_EK_14   | M + Intercrop | 7.28 | 25000.0 | 2487.0  | 10.05     | 72.30 | 512.07        | 4040.20 | 1428.41 | 92.25  | 28.53    | 19.76     | 92.25  | 182.36 | 1956.73 | 5452.33  | 4776.95 | 26.17                   | 74.10 | 29.90 | 1.01                 | 1.69 | 3.82 | 120.13  | 4.31  | 16.07 | 23.25  | 124.44    |
| 16_EK_15   | M + Intercrop | 7.09 | 29750.0 | 2921.5  | 10.18     | 75.71 | 643.47        | 3990.85 | 1356.33 | 94.39  | 29.20    | 32.17     | 111.02 | 221.07 | 2287.14 | 6987.24  | 4925.31 | 28.13                   | 57.12 | 27.54 | 1.41                 | 1.59 | 4.49 | 166.38  | 6.21  | 16.08 | 33.73  | 172.60    |
| 16_EK_16   | M + Intercrop | 7.14 | 30550.0 | 3013.0  | 10.14     | 71.94 | 652.25        | 4062.49 | 1365.71 | 83.85  | 29.61    | 33.09     | 113.48 | 217.43 | 2276.30 | 6972.19  | 5062.68 | 28.65                   | 58.27 | 26.98 | 1.45                 | 1.63 | 4.29 | 160.18  | 6.10  | 34.11 | 49.88  | 166.29    |
| 16_EK_17   | M + Intercrop | 7.32 | 25050.0 | 2508.5  | 9.99      | 59.36 | 531.08        | 4035.99 | 1576.90 | 133.58 | 29.23    | 27.30     | 132.66 | 237.39 | 2159.13 | 6194.72  | 5205.08 | 24.60                   | 65.15 | 30.30 | 1.26                 | 2.14 | 4.56 | 194.28  | 5.10  | 14.09 | 44.73  | 199.38    |
| 16_EK_18   | M + Intercrop | 7.39 | 25050.0 | 2521.5  | 9.93      | 61.10 | 503.10        | 4062.88 | 1435.20 | 135.95 | 28.78    | 24.54     | 121.22 | 230.79 | 1509.03 | 4419.98  | 3763.34 | 33.34                   | 91.92 | 38.14 | 1.63                 | 2.74 | 6.13 | 189.89  | 4.67  | 9.65  | 50.43  | 194.56    |
| 16_EK_19   | M + Intercrop | 7.26 | 29800.0 | 2854.5  | 10.44     | 65.46 | 522.86        | 4404.11 | 1380.21 | 67.94  | 30.21    | 23.84     | 117.64 | 170.77 | 2286.46 | 7071.16  | 5303.24 | 22.87                   | 62.28 | 26.03 | 1.04                 | 1.66 | 3.22 | 54.34   | 4.62  | 15.08 | 35.70  | 58.97     |
| 16_EK_20   | M + Intercrop | 7.26 | 28250.0 | 2656.5  | 10.63     | 71.39 | 582.38        | 4793.79 | 1446.18 | 85.48  | 32.90    | 24.12     | 117.93 | 175.75 | 2036.93 | 6120.81  | 4837.36 | 28.59                   | 78.32 | 29.90 | 1.18                 | 1.93 | 3.63 | 75.04   | 5.21  | 20.67 | 35.45  | 80.25     |
| 16_EK_21   | M + Intercrop | 7.24 | 26200.0 | 2532.5  | 10.35     | 63.14 | 546.05        | 4059.17 | 1458.93 | 94.01  | 29.00    | 19.44     | 90.00  | 193.33 | 2197.03 | 6457.94  | 5427.05 | 24.85                   | 62.86 | 26.88 | 0.88                 | 1.39 | 3.56 | 49.89   | 3.62  | 19.94 | 36.55  | 53.51     |
| 16_EK_22   | M + Intercrop | 7.31 | 28200.0 | 2598.5  | 10.85     | 71.60 | 508.81        | 4118.97 | 1333.87 | 138.26 | 28.86    | 17.70     | 86.52  | 175.38 | 2070.50 | 6009.21  | 4919.02 | 24.57                   | 68.54 | 27.12 | 0.85                 | 1.44 | 3.57 | 53.07   | 4.59  | 18.72 | 31.36  | 57.66     |
| 16_EK_23   | M + Intercrop | 7.21 | 31950.0 | 3139.5  | 10.18     | 73.62 | 713.07        | 4918.25 | 1889.13 | 107.44 | 35.84    | 35.80     | 138.20 | 284.89 | 2257.89 | 6576.65  | 5198.27 | 31.58                   | 74.78 | 36.34 | 1.59                 | 2.10 | 5.48 | 178.08  | 6.92  | 29.21 | 43.49  | 185.00    |
| 16_EK_24   | M + Intercrop | 7.21 | 31950.0 | 3031.5  | 10.54     | 69.80 | 598.79        | 4217.66 | 1649.96 | 84.87  | 30.68    | 29.53     | 111.23 | 266.26 | 2167.85 | 6555.92  | 5213.09 | 27.62                   | 64.33 | 31.65 | 1.36                 | 1.70 | 5.11 | 172.99  | 5.81  | 27.00 | 41.82  | 178.80    |
| 16_EK_25   | M + Intercrop | 6.88 | 33900.0 | 3018.0  | 11.23     | 82.21 | 598.14        | 4988.55 | 1304.90 | 96.92  | 33.69    | 22.88     | 112.98 | 148.02 | 1917.03 | 6063.82  | 4468.04 | 31.20                   | 82.27 | 29.21 | 1.19                 | 1.86 | 3.31 | 11.02   | 6.00  | 21.87 | 54.21  | 17.02     |
| 16_EK_26   | M + Intercrop | 6.84 | 33850.0 | 2917.5  | 11.60     | 87.80 | 539.52        | 4380.78 | 1221.59 | 113.22 | 30.02    | 25.45     | 128.16 | 151.55 | 1944.39 | 6216.35  | 4457.77 | 27.75                   | 70.47 | 27.40 | 1.31                 | 2.06 | 3.40 | 3.52    | 9.50  | 11.02 | 44.87  | 13.02     |
| 16_EK_27   | M + Intercrop | 6.98 | 27750.0 | 2538.0  | 10.93     | 60.88 | 527.73        | 3791.19 | 1242.81 | 79.46  | 26.89    | 20.97     | 89.40  | 168.80 | 2049.32 | 5249.48  | 4643.22 | 25.75                   | 72.22 | 26.77 | 1.02                 | 1.70 | 3.64 | 37.30   | 5.19  | 17.82 | 30.87  | 42.50     |
| 16_EK_28   | M + Intercrop | 7.02 | 26950.0 | 2398.0  | 11.24     | 58.70 | 538.95        | 3823.32 | 1245.92 | 92.91  | 27.21    | 20.54     | 82.02  | 175.47 | 2256.41 | 6657.50  | 5148.93 | 23.89                   | 57.43 | 24.20 | 0.91                 | 1.23 | 3.41 | 47.17   | 4.43  | 26.73 | 34.80  | 51.61     |
| 16_EK_29   | M + Intercrop | 6.97 | 31850.0 | 2788.5  | 11.42     | 65.02 | 478.21        | 4642.78 | 1127.39 | 94.12  | 30.50    | 19.39     | 118.37 | 132.65 | 2267.35 | 6697.46  | 4949.58 | 21.09                   | 69.32 | 22.78 | 0.86                 | 1.77 | 2.68 | 15.73   | 5.18  | 9.29  | 26.10  | 20.91     |
| 16_EK_30   | M + Intercrop | 7.03 | 30700.0 | 2674.0  | 11.48     | 65.41 | 477.18        | 4550.08 | 1008.44 | 91.15  | 29.71    | 21.01     | 121.89 | 129.91 | 2070.84 | 6141.25  | 4724.18 | 23.04                   | 74.09 | 21.35 | 1.01                 | 1.98 | 2.75 | 17.95   | 6.11  | 8.76  | 26.82  | 24.06     |
| 16_EK_31   | M + Intercrop | 7.10 | 27100.0 | 2392.0  | 11.33     | 59.35 | 512.89        | 4723.94 | 1130.08 | 133.05 | 31.37    | 14.75     | 87.51  | 115.46 | 2137.09 | 5626.63  | 4767.93 | 24.00                   | 83.96 | 23.70 | 0.69                 | 1.56 | 2.42 | 14.55   | 3.67  | 7.98  | 29.72  | 18.22     |
| 16_EK_32   | M + Intercrop | 7.13 | 27600.0 | 2457.0  | 11.23     | 54.61 | 496.48        | 4541.55 | 1175.19 | 144.29 | 30.49    | 14.80     | 85.34  | 114.89 | 2296.51 | 5961.96  | 5087.83 | 21.62                   | 76.18 | 23.10 | 0.64                 | 1.43 | 2.26 | 26.37   | 2.95  | 9.31  | 26.66  | 29.32     |
| 16_EK_33   | M + Intercrop | 6.98 | 22000.0 | 2113.5  | 10.41     | 59.31 | 452.48        | 3464.42 | 995.31  | 129.73 | 24.21    | 14.83     | 70.34  | 120.46 | 1948.25 | 4682.72  | 4498.62 | 23.23                   | 73.98 | 22.12 | 0.76                 | 1.50 | 2.68 | 28.52   | 4.17  | 10.37 | 16.83  | 32.69     |
| 16_EK_34   | M + Intercrop | 7.07 | 22050.0 | 2077.0  | 10.62     | 52.82 | 513.02        | 3870.75 | 1136.79 | 127.72 | 27.10    | 12.93     | 61.20  | 113.44 | 1853.20 | 4698.52  | 4157.61 | 27.68                   | 82.38 | 27.34 | 0.70                 | 1.30 | 2.73 | 40.98   | 2.92  | 10.52 | 16.18  | 43.90     |
| 16_EK_35   | M + Intercrop | 6.95 | 24750.0 | 2376.5  | 10.41     | 65.43 | 505.76        | 3732.88 | 1333.33 | 103.30 | 26.75    | 14.44     | 66.04  | 143.47 | 1717.10 | 4525.17  | 3613.02 | 29.45                   | 82.49 | 36.90 | 0.84                 | 1.46 | 3.97 | 10.39   | 4.23  | 15.91 | 30.21  | 14.62     |
| 16_EK_36   | M + Intercrop | 6.96 | 23800.0 | 2254.0  | 10.56     | 69.88 | 507.65        | 3806.40 | 1151.71 | 110.21 | 26.69    | 19.33     | 90.26  | 171.17 | 2181.15 | 5479.75  | 4796.58 | 23.27                   | 69.46 | 24.01 | 0.89                 | 1.65 | 3.57 | 2.24    | 5.44  | 19.32 | 31.22  | 7.68      |
| 16_EK_37   | Manure        | 7.36 | 49750.0 | 3675.5  | 13.54     | 74.91 | 688.55        | 6208.58 | 2325.76 | 157.55 | 43.43    | 38.08     | 186.94 | 391.54 | 2915.58 | 10871.45 | 6488.41 | 23.62                   | 57.11 | 35.84 | 1.31                 | 1.72 | 6.03 | 44.41   | 9.43  | 34.32 | 92.65  | 53.84     |
| 16_EK_38   | Manure        | 7.32 | 54200.0 | 3671.0  | 14.76     | 76.59 | 552.03        | 5516.35 | 1904.70 | 110.39 | 37.55    | 41.02     | 206.99 | 336.11 | 2402.27 | 9689.02  | 5526.18 | 22.98                   | 56.93 | 34.47 | 1.71                 | 2.14 | 6.08 | 6.12    | 10.68 | 16.24 | 100.48 | 16.79     |
| 16_EK_39   | Manure        | 7.30 | 35750.0 | 2913.5  | 1         |       |               |         |         |        |          |           |        |        |         |          |         |                         |       |       |                      |      |      |         |       |       |        |           |
