# Supplementary material for: Women's agricultural practices and their effects on soil nutrient content in the Nyalenda urban gardens of Kisumu, Kenya
Source: Copernicus journal article supplement (doi:10.5194/soil-5-303-2019), 2019-10-15
Supplement: Supplementary file [file soil-5-303-2019-supplement-title-page.pdf › soil-5-303-2019-supplement-title-page.pdf]

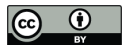

## *Supplement of*

# **Women's agricultural practices and their effects on soil nutrient content in the Nyalenda urban gardens of Kisumu, Kenya**

**Nicolette Tamara Regina Johanna Maria Jonkman et al.**

*Correspondence to:* Nicolette Tamara Regina Johanna Maria Jonkman ([n.t.jonkman@uva.nl](mailto:n.t.jonkman@uva.nl))

- [soil-5-303-2019-supplement-title-page.pdf](#)
- [Supplement\\_S1\\_S2\\_S3\\_IandFGDs\\_1\\_7\\_19.pdf](#)
- [Supplement\\_S4\\_WK\\_TJ.pdf](#)

The copyright of individual parts of the supplement might differ from the CC BY 4.0 License.
